# Supplementary material
Source: MDPI journal article supplement (https://www.mdpi.com/2311-5637/8/8/364)

Figure S1: Heatmaps of the relative abundance (%) of volatiles organic compounds in apricot puree fermented by four LAB strains

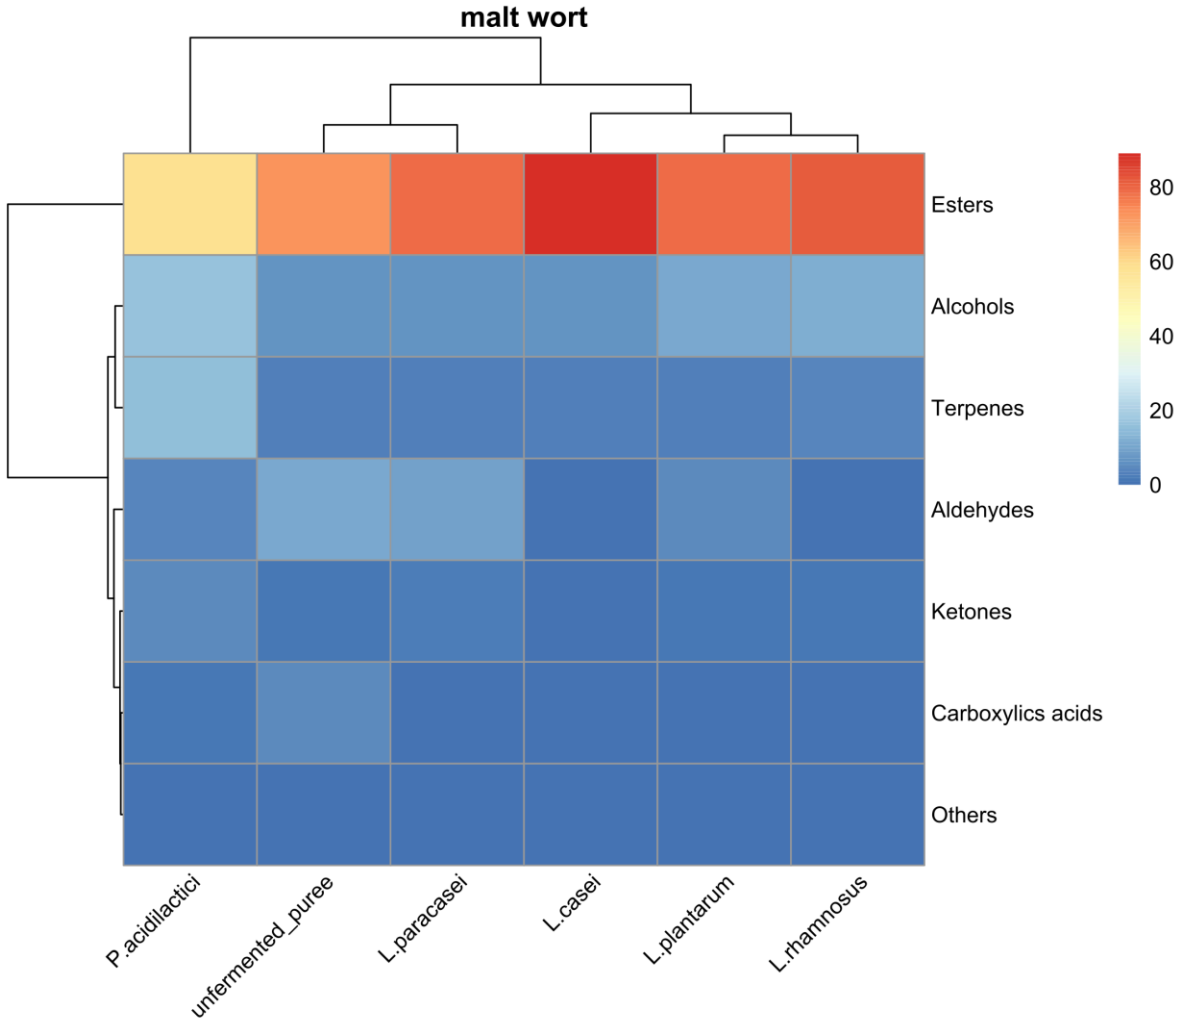

Supplement: s1 [file s1 › fermentation-1813321-supplementary.pdf]
